# Supplementary material for: Nectin-2 Acts as a Viral Entry Mediated Molecule That Binds to Human Herpesvirus 6B Glycoprotein B
Source: MDPI journal article supplement (doi:10.3390/v14010160), 2022-01-16
Supplement: s1 [file s1]

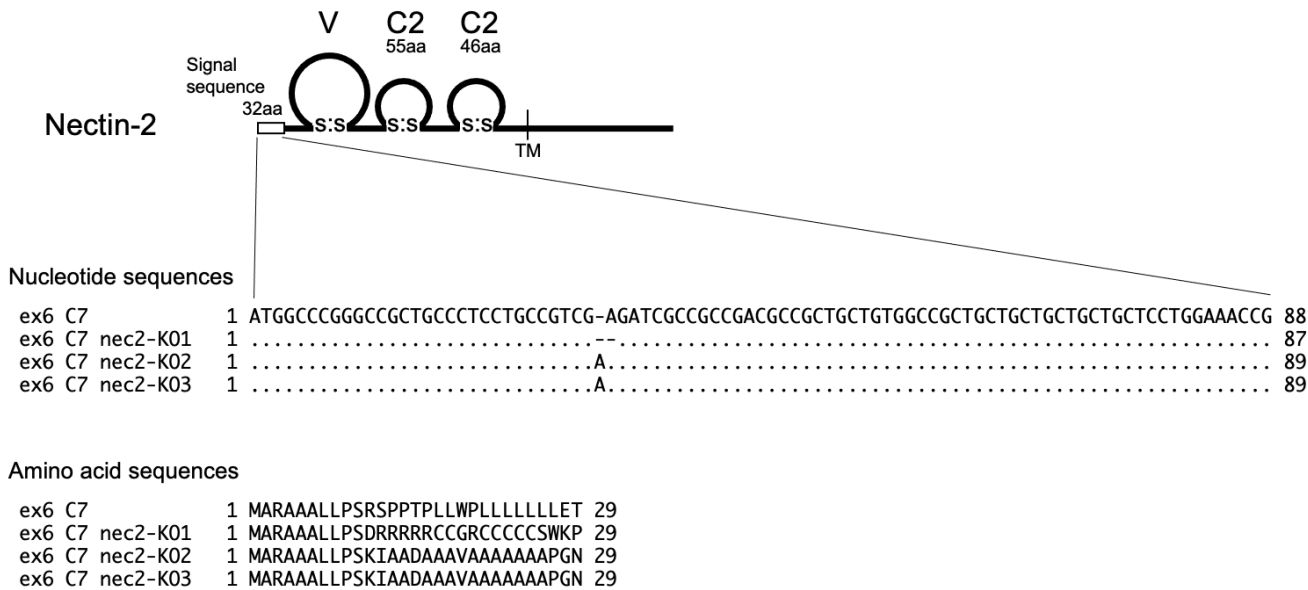

**Figure S1.** Target sequences in the nectin-2 knockout ex6 C7 cell clones. Schematic representation of the nectin-2, the edited nucleotide sequences, and the resulting amino acid sequences. Sequence analysis showed that the nectin-2 gene of ex6 C7-nec2-KO1 cells had a 2-nucleotide deletion in the signal sequence and that the ex6 C7-nec2-KO2 and-KO3 cells had a 1-nucleotide insertion, leading to the abolishment of a signal peptide and nectin-2 expression.

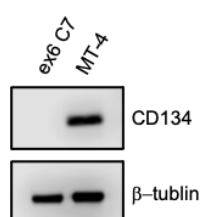

**Figure S2.** CD134 without the transmembrane anchor sequence was not detected inside the ex6 C7 cells. Ex6 C7 cells ( $7.5 \times 10^5$  cells) were washed with cold PBS, and then treated with 50  $\mu$ L of cold lysis buffer containing a protease inhibitor cocktail for 15 min at 4°C. Cell lysates were sonicated at 4°C for 10 s and centrifuged at  $21,000 \times g$  for 10 min at 4°C. Aliquots of the supernatants (soluble fraction) were used for immunoblotting with anti-human CD134 monoclonal antibody (mAb) (clone: Ber-ACT35) and anti- $\beta$ -tubulin mAb. MT-4 cells were used as the positive control.

|                   |     |                                                                                                                                                       |     |  |
|-------------------|-----|-------------------------------------------------------------------------------------------------------------------------------------------------------|-----|--|
| <b>A</b>          |     |                                                                                                                                                       |     |  |
| HSV-1_KOS-gD      | 1   | KYALADASLKMADPNRFRGKDLVLDQLTDPGVRVYHIQAGLPDPFPQPSLPITVYAVLERACRSVLLNAPSEAPQIVRGASEDVVRKQPNLTIAWFRMGNGCAIPITVMEYTECSYKSLGACPIRTQPRWNYDFSFAVSEDNLG      | 150 |  |
| HSV-1_KOS_Rid1-gD | 1   | .....P.....                                                                                                                                           | 150 |  |
| HSV-1_KOS_Rid2-gD | 1   | .....R.....                                                                                                                                           | 150 |  |
| HSV-1_ANG-gD      | 1   | .....P.R.....                                                                                                                                         | 150 |  |
| HSV-2_333-gD      | 1   | .....P.....N.....R.....K.....PS.E.....I.....H.....DEA..HT.....Y...D.....P.....V.....S.....                                                            | 150 |  |
|                   |     |                                                                                                                                                       |     |  |
| HSV-1_KOS-gD      | 151 | FLMHAPAFETAGTYLRLVKINDWTEITQFILEHRAKGSCKYALPLRIPPSACLSPQAYQQGVTVDSIGMLPRFIPENQRTVAVYSLKIAGWHGPKAPYTSTLLPPELSETPNATQPELAPEDPEDSALLEDPVGTVPQIPPNWHIPSIQ | 300 |  |
| HSV-1_KOS_Rid1-gD | 151 | .....                                                                                                                                                 | 300 |  |
| HSV-1_KOS_Rid2-gD | 151 | .....                                                                                                                                                 | 300 |  |
| HSV-1_ANG-gD      | 151 | .....I.....                                                                                                                                           | 300 |  |
| HSV-2_333-gD      | 151 | .....RA.....A..TSK.....L.....P.....D.T.....V.....A..SS.....                                                                                           | 300 |  |
|                   |     |                                                                                                                                                       |     |  |
| HSV-1_KOS-gD      | 301 | DAATPYHPPATPNMGLIAGAVGSSLAALVICGIVYWMHRRTRKAPKRIRLPHIREDDQPSHHQPLFY                                                                                   | 369 |  |
| HSV-1_KOS_Rid1-gD | 301 | .....                                                                                                                                                 | 369 |  |
| HSV-1_KOS_Rid2-gD | 301 | .....R..Q.G.....                                                                                                                                      | 369 |  |
| HSV-1_ANG-gD      | 301 | .....                                                                                                                                                 | 369 |  |
| HSV-2_333-gD      | 301 | .V..-H.A..A.S.P..I..LA..T..V...G..AF.VR..AQM...L.....D..A.P.....                                                                                      | 368 |  |
|                   |     |                                                                                                                                                       |     |  |
| <b>B</b>          |     |                                                                                                                                                       |     |  |
| HHV-68_HST-gB     | 1   | SDNYIRAGYNHYPFRICSIAGKTDLMRFRDISCSYKSNAMSEGGFFIIYKNTIETTFPVRTYKNELTFQTSYRDVGCVYFLDRTVMGLAMPVYEANLVNSRAQCYSAVAIRKPDGTVFSAIHEDNNKNETLELFFLNFKSVTNKRF    | 150 |  |
| HHV-68_Z29-gB     | 1   | ..D.....                                                                                                                                              | 150 |  |
|                   |     |                                                                                                                                                       |     |  |
| HHV-68_HST-gB     | 151 | ITTKEPYFARGPLWLYSTSLNCIVTEAMAKAYPFYSFALTTEIVEGSPFFDGSNGKHFAPLEKLTILENYTMIEDLMNGMGATTLVKRIAFLEKGDTLFSWEIKEENESVCMKHMTTTHGLRAETDETYHFIISKELTAAFTV       | 300 |  |
| HHV-68_Z29-gB     | 151 | .....T.....K.....A.....                                                                                                                               | 300 |  |
|                   |     |                                                                                                                                                       |     |  |
| HHV-68_HST-gB     | 301 | PKDSLNLTPDKQTCIKNEFENIKEYVMSYNDYTMNGSYQIFKTTGDLILIWQPLVQKSLMVLEQGSVNLRRRDLVDVKSRRHILYVQLQYLDTLKDYNALGNLAESWCLDQKRTITMLHLSKISPSIVSEVYGRPISAGLH         | 450 |  |
| HHV-68_Z29-gB     | 301 | S.E.....K..TD.....                                                                                                                                    | 450 |  |
|                   |     |                                                                                                                                                       |     |  |
| HHV-68_HST-gB     | 451 | GDVLAISKIEVNQSSVQLHKSRRVDAKGLRSETMTCYNRPLVTFSEVNSTPEVVPQGLDNEILLGDHRTREECEIPSTKIFLSGNHAHVYDYTHNTSTPIEDIEVLDAFIRLKIIDPLENADFKLLDLYSPDELSRANVFDLENILRE  | 600 |  |
| HHV-68_Z29-gB     | 451 | .....V.....                                                                                                                                           | 600 |  |
|                   |     |                                                                                                                                                       |     |  |
| HHV-68_HST-gB     | 601 | YNSYKSALYTIEAKIATNTPSYVNGINSFLQGLAIGTGLGSVISVTAGALGDIVGGVVSFLKNPFGGGLMLILAIIVVVVIIIVVFVRQKHVLSKPIDMMFPYATNPVTVSSVTGTTVVKTSPVKDADGGTSVAVSEKEEGMADVSGQI | 750 |  |
| HHV-68_Z29-gB     | 601 | .....T.....                                                                                                                                           | 750 |  |
|                   |     |                                                                                                                                                       |     |  |
| HHV-68_HST-gB     | 751 | SGDEYSQEDALKMLKAISLDESRYRRKPSSSESHASKPSLIDIRIRYRGYKSVNVEEA                                                                                            | 807 |  |
| HHV-68_Z29-gB     | 751 | .....                                                                                                                                                 | 807 |  |

**Figure S3.** Comparison of the gD and gB amino acid sequences. (A) gD amino acid sequences in the HSV-1 strain KOS, HSV-1 mutant strains, and HSV-2 strain 333. The 25-amino acid signal sequence is excluded. The amino acid substitutions (L25P, Q27P, and Q27R) in HSV-1 that could be important for entry in nectin-2 expressing cells are identified in red (Dean *et al.*, 1994. *Virology*, Lopez *et al.*, 2000. *J Virol*). (B) gB amino acid sequences in HHV-6B strains HST and Z29. The 31-amino acid signal sequence is excluded.
